# Supplementary material
Source: PubMed Central journal article supplement (PMC3288671)
Supplement: NIHMS349311-supplement-supplement_1.pdf [file NIHMS349311-supplement-supplement_1.pdf]

**Supplemental Table.** Characteristics of the sample by partner type ( $n = 1,154$ )

| Variables                                | Steady Only<br>( $n = 595$ ) | Casual Only<br>( $n = 81$ ) | Both Steady and Casual<br>( $n = 478$ ) | Test for Differences          |
|------------------------------------------|------------------------------|-----------------------------|-----------------------------------------|-------------------------------|
| <b>Demographics</b>                      |                              |                             |                                         |                               |
| Age                                      | 32.36 (8.86) <sup>a</sup>    | 30.65 (7.38)                | 30.53 (7.42) <sup>a</sup>               | $F(2, 1150) = 7.08, p = .00$  |
| Gender (% women)                         | 34%                          | 27%                         | 16%                                     | $\chi^2(2) = 43.09, p = .00$  |
| Ethnicity (% Black African)              | 98%                          | 96%                         | 99%                                     | $\chi^2(2) = 2.53, p = .28$   |
| <b>Sexual Risk Factors</b>               |                              |                             |                                         |                               |
| Participant drank alcohol before sex     | 4.84 (6.79) <sup>a</sup>     | 5.52 (6.46) <sup>b</sup>    | 9.96 (11.44) <sup>ab</sup>              | $F(2, 1114) = 70.12, p = .00$ |
| Partner drank alcohol before sex         | 3.17 (5.17) <sup>a</sup>     | 3.61 (5.56)                 | 5.65 (9.72) <sup>a</sup>                | $F(2, 1122) = 22.85, p = .00$ |
| Heavy episodic drinking                  | 57%                          | 65%                         | 62%                                     | $\chi^2(2) = 3.90, p = .14$   |
| <b>Sexual Risk Behaviors</b>             |                              |                             |                                         |                               |
| Frequency of condom use, steady partners | 3.27 (2.01)                  | --                          | 2.83 (1.86)                             | $t(1071) = -3.68, p = .00$    |
| Frequency of condom use, casual partners | --                           | 4.66 (1.74)                 | 4.62 (1.75)                             | $t(555) = -0.22, p = .83$     |

*Note.* Unadjusted means (SD) are provided except where noted. Post hoc analyses were performed on all continuous measures (except for sexual risk behaviors) using Scheffe tests; means sharing a common subscript are statistically different at  $\alpha = .05$ . Analyses with stratified by steady or casual partner(s) includes participants who reported having sex with only a steady or casual partner, respectively. Heavy episodic drinking was defined as 5 or more drinks on a single occasion during the past week.
